# Supplementary material
Source: PubMed Central journal article supplement (PMC6694397)
Supplement: jamapsychiatry-76-1133-s001.pdf [file jamapsychiatry-76-1133-s001.pdf]

## Supplementary Online Content

Brandt L, Henssler J, Müller M, Wall S, Gabel D, Heinz A. Risk of psychosis among refugees: a systematic review and meta-analysis. *JAMA Psychiatry*. Published online August 14, 2019. doi:10.1001/jamapsychiatry.2019.1937

**eFigure 1.** Database Search Entry

**eFigure 2.** Relative Risk (RR) of Incidence of Non-Affective Psychosis in Refugees Compared to the Native Population

**eFigure 3.** Funnel Plot of Main Analysis

### References

This supplementary material has been provided by the authors to give readers additional information about their work.

**eFigure 1. Database Search Entry**

Search term for the systematic literature search as used in Embase, PsycINFO, and Pubmed from 1977 to March 8th 2018:

migrant OR migrants OR migration OR immigration OR immigrant OR immigrants OR ethnicity OR refugee OR refugees OR asylum seeker OR asylum seekers OR minority OR minorities OR ethnic density

AND

psychotic OR psychosis OR schizophrenia OR schizophrenic OR schizoaffective

**eFigure 2.** Relative Risk (RR) of Incidence of Non-Affective Psychosis in Refugees Compared to the Native Population

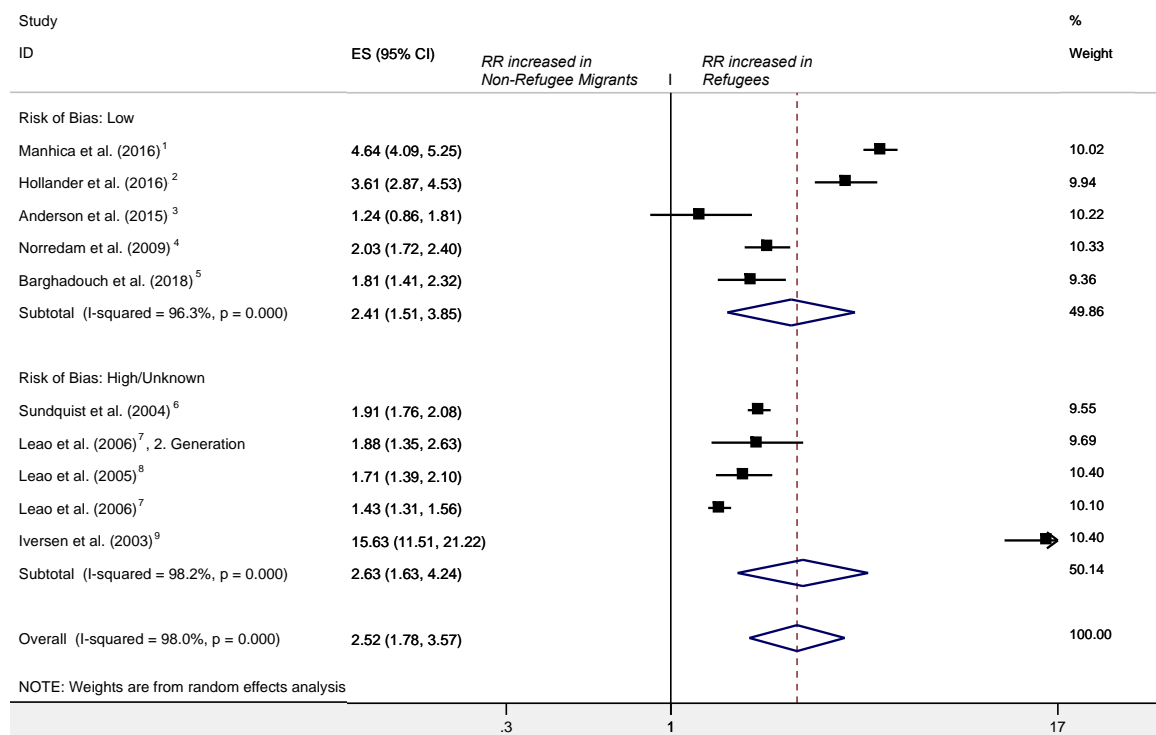

Forest plot of relative risk (RR) of non-affective psychosis incidence in refugees compared to the native population in “low” risk of bias studies and “high/unknown” risk of bias studies. The square data markers indicate relative risk (RR) in primary studies, with sizes reflecting the statistical weight of the study using random-effects meta-analysis. The horizontal lines indicate 95% CIs. The blue diamond data markers represent the subtotal and overall RR and 95% CI. The vertical dashed line shows the summary effect estimate and the continuous line shows the line of no effect (RR = 1). Unless otherwise stated, refugees are first generation cohorts. ES = effect size, HR = hazard ratio, RaR = rate ratio.

**eFigure 3.** Funnel Plot of Main Analysis

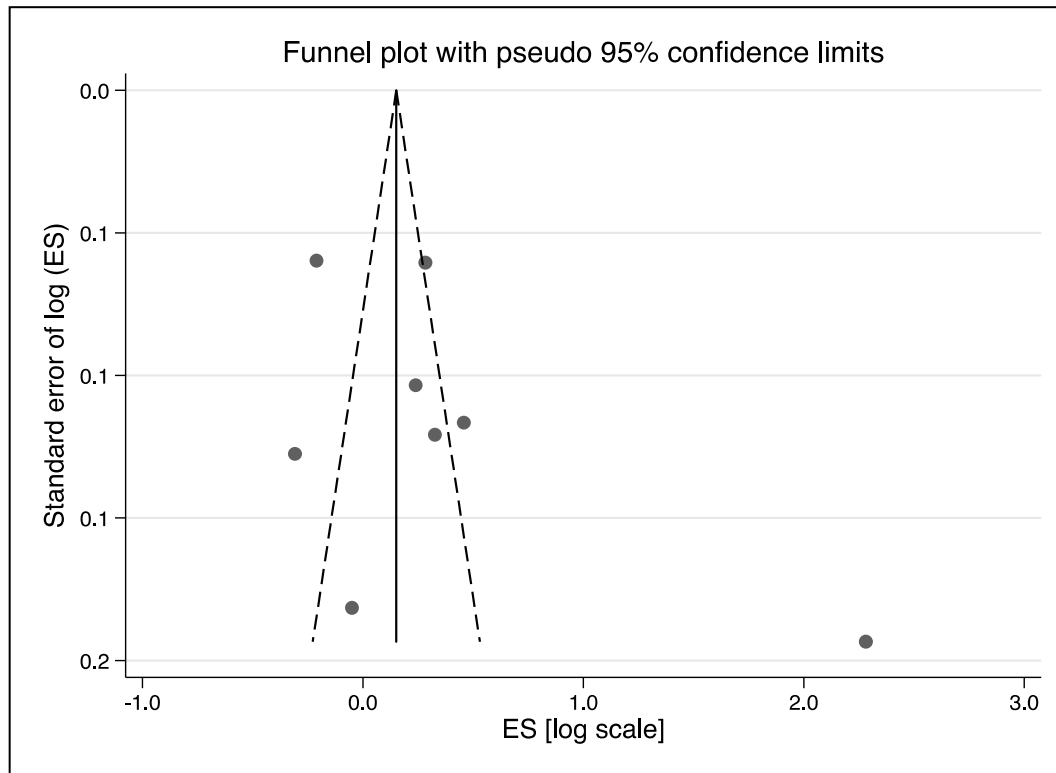

Funnel plot of relative risk (RR) of incidence of non-affective psychosis in refugees compared to non-refugee migrants. ES = Effect Size.

## References

1. Manhica H, Hollander A-C, Almquist YB, Rostila M, Hjern A. Origin and schizophrenia in young refugees and inter-country adoptees from Latin America and East Africa in Sweden: a comparative study. *BJPsych open*. 2016;2(1):6-9.
2. Hollander AC, Dal H, Lewis G, Magnusson C, Kirkbride JB, Dalman C. Refugee migration and risk of schizophrenia and other non-affective psychoses: Cohort study of 1.3 million people in Sweden. *BMJ (Online)*. 2016;352:i1030.
3. Anderson KK, Cheng J, Susser E, McKenzie KJ, Kurdyak P. Incidence of psychotic disorders among first-generation immigrants and refugees in Ontario. *CMAJ*. 2015;187(9):E279-E286.
4. Norredam M, Garcia-Lopez A, Keiding N, Krasnik A. Risk of mental disorders in refugees and native Danes: A register-based retrospective cohort study. *Social Psychiatry and Psychiatric Epidemiology*. 2009;44(12):1023-1029.
5. Barghadouch A, Carlsson J, Norredam M. Psychiatric disorders and predictors hereof among refugee children in early adulthood: A register-based cohort study. *Journal of Nervous and Mental Disease*. 2018;206(1):3-10.
6. Sundquist K, Frank G, Sundquist J. Urbanisation and incidence of psychosis and depression: follow-up study of 4.4 million women and men in Sweden. *The British Journal of Psychiatry*. 2004;184(4):293-298.
7. Leao TS, Sundquist J, Frank G, Johansson LM, Johansson SE, Sundquist K. Incidence of schizophrenia or other psychoses in first- and second-generation immigrants: A National Cohort Study. *Journal of Nervous and Mental Disease*. 2006;194(1):27-33.
8. Leao TS, Sundquist J, Johansson LM, Johansson SE, Sundquist K. Incidence of mental disorders in second-generation immigrants in Sweden: A four-year cohort study. *Ethnicity and Health*. 2005;10(3):243-256.
9. Iversen VC, Morken G. Acute admissions among immigrants and asylum seekers to a psychiatric hospitals in Norway. *Social Psychiatry and Psychiatric Epidemiology*. 2003;38(9):515-519.
